# Supplementary material for: A Situational Analysis of the Contextual Factors Influencing Vaccine Uptake on Koome Island, Lake Victoria, Uganda
Source: Research Square preprint supplement (doi:10.21203/rs.3.rs-7359304/v1), 2025-10-08
Supplement: Supplementary file 2 [file b5b9be313e7902f4ade65945.pdf]

## **A Discussion Guide to the Situational Analysis**

### **NIHR Global Health Research Group on Vaccines for vulnerable people in Africa (Vanguard) Social Science and Community Engagement Work Packages (2&5)**

**Title:** Situational Analysis Guide for Stakeholder engagements on Koome Island Visit  
(Work Package (WP) 2 & Work Package (WP) 5).

#### **Purpose of the visit**

1. To identify and seek active participation of stakeholders and gather relevant information ahead of the case studies and community engagement activities.
2. To observe and identify community structures (e.g., security/police presence, population distribution, villages, potential meeting venues).

#### **Stakeholders / Key Players to engage**

- LC1 chairpersons / LC3 / Sub- County chiefs
- EPI focal persons (Health workers)
- Village Health Teams (VHTs)
- Head teachers / teachers
- Youth councillors
- Beach Management Unit leaders (fisherfolk representatives)

#### **Key Information Area**

##### **WP5**

- How best can communities be engaged to improve or influence vaccine uptake?
- Common communication channels for sharing health information (e.g., health campaigns).
- Language(s) widely spoken.
- Meeting places / community structures useful for engagement (e.g., churches, mosques, associations).
- Key contact people for initial engagement.

##### **WP2**

- Immunisation schedules and days; distribution of health facilities.
- Population and household structure.

- Recommendations for the selection of study sites.
- Common health-seeking behaviours.
- Common vaccine-preventable diseases.
- Ideal times for fieldwork.
- Availability of locally based staff for recruitment.
- Local terminology for vaccines/vaccination and other fishing community-specific terms.

### **General Information to Capture**

- Stakeholder analysis – key influencers (leaders, health workers, educators, community members).
- Economic activities.
- Water, hygiene, and sanitation facilities; waste management practices.
- Cultural practices.
- Formal and informal leadership structures.
